# Supplementary material
Source: PubMed Central journal article supplement (PMC3644636)
Supplement: mmc1.pdf [file mmc1.pdf]

## Supplemental Data

### Mutations in *FGF17*, *IL17RD*, *DUSP6*, *SPRY4*, and *FLRT3*

### Are Identified in Individuals with Congenital

### Hypogonadotropic Hypogonadism

Hichem Miraoui, Andrew A. Dwyer, Gerasimos P. Sykiotis, Lacey Plummer, Wilson Chung, Bihua Feng, Andrew Beenken, Jeff Clarke, Tune H. Pers, Piotr Dworzynski, Kimberley Keefe, Marek Niedziela, Taneli Raivio, William F. Crowley, Jr., Stephanie B. Seminara, Richard Quinton, Virginia A. Hughes, Philip Kumanov, Jacques Young, Maria A. Yialamas, Janet E. Hall, Guy Van Vliet, Jean-Pierre Chanoine, John Rubenstein, Moosa Mohammadi, Pei-San Tsai, Yisrael Sidis, Kasper Lage, and Nelly Pitteloud

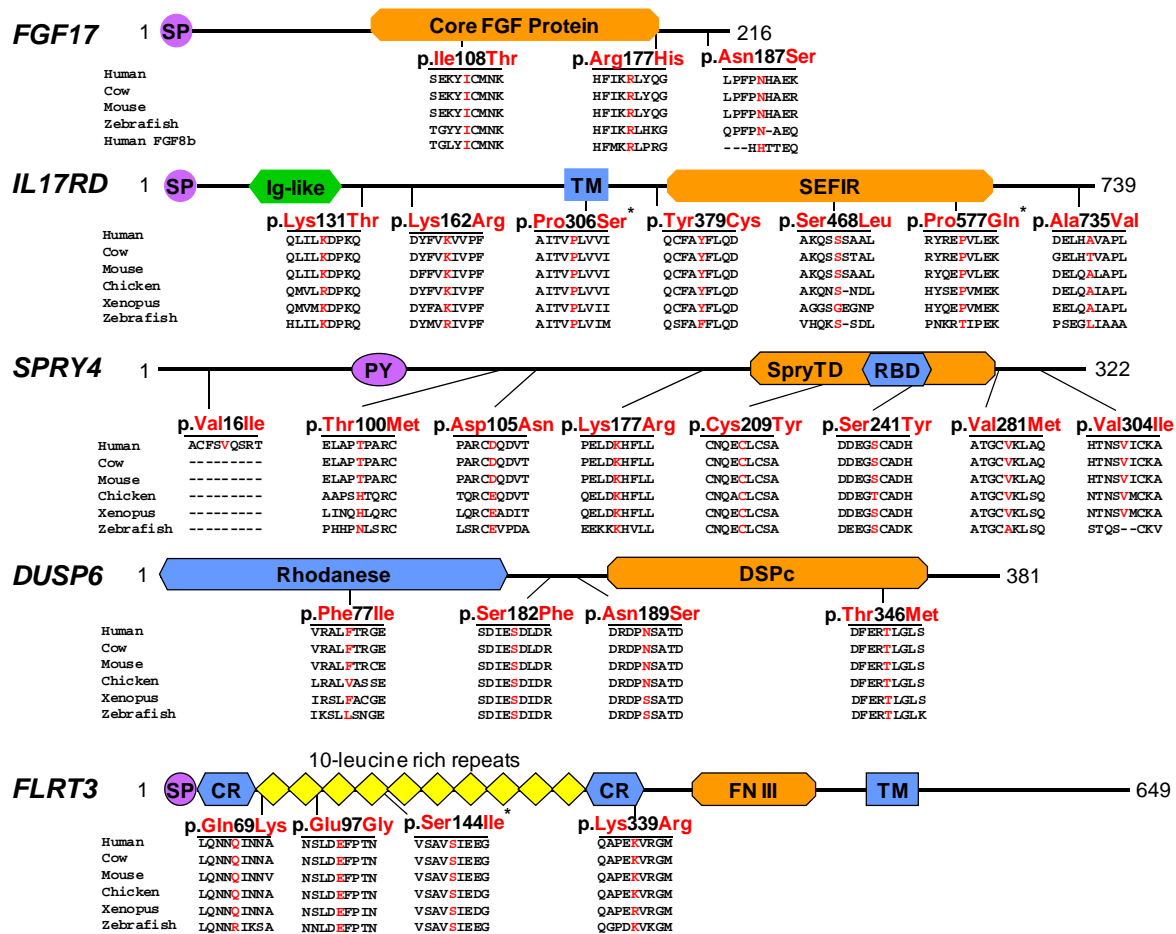

**Figure S1. Schematics of *FGF17*, *IL17RD*, *SPRY4*, *DUSP6*, and *FLRT3* Depicting Structural Domains, Location of Mutations, and Conservation across Species**

*FGF17* : SP= signal peptide.

*IL17RD* : Ig-like = immunoglobulin-like, TM=transmembrane, SEFIR= SEF/IL-17R domain, \* homozygous.

*SPRY4* : PY=Phosphotyrosine-binding domain, SpryTD=Spry translocation domain, RBD=Raf1-binding domain.

*DUSP6* : DSPc=Dual specificity phosphatases domain.

*FLRT3* : CR=Cysteine rich domain, FN III=Fibronectin type-III domain, \* homozygous.

The conservation across species was done using ClustalW2 software. The sequence for *FGF17* has yet to be characterized in chicken and Xenopus.

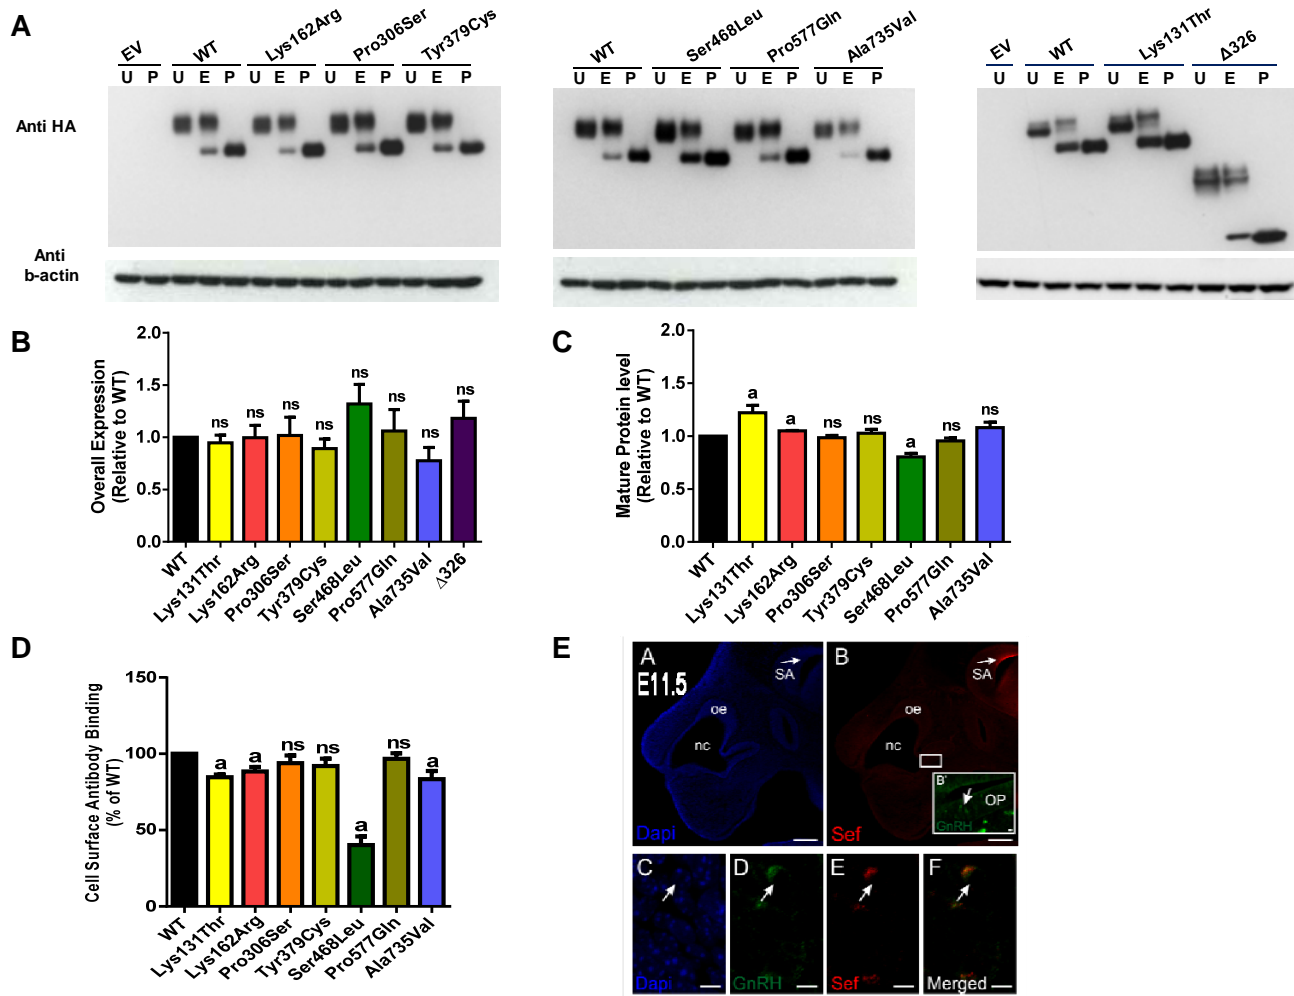

**Figure S2. Expression of WT and Mutant IL17RD In Vitro and Expression of IL17rd in the Nasal Region of WT Mouse Embryos (E 11.5)**

Panels (A)–(C) depict the overall expression and maturation levels of IL17RD mutants.

(A) A representative western blot analysis of whole cell lysate of HEK293T cells transfected with IL17RD mutants. U = Untreated, E = EndoHf, P = PNGaseF.

(B and C) Quantification of overall expression (B) and maturation level (C) of three independent experiments. Data were normalized to IL17RD WT and are plotted as means  $\pm$  SEM. All IL17RD mutants had overall protein expression similar to WT. The p.Ser468Leu mutant had decreased maturation level; Pro306Ser, Tyr379Cys, Pro577Gln and Ala735Val were similar to the WT. The Lys131Thr and Lys162Arg had a small increases compare to the WT.

(D) Cell surface expression of IL17RD mutants in COS7 cells. Data were normalized to IL17RD WT and are plotted as means  $\pm$  SEM. Experiments were performed in quadruplets and repeated four times. Lys131Thr, Lys162Arg, Ser468Leu and Ala735Val mutants showed decreased expression levels while Pro306Ser, Tyr379Cys and Pro577Gln were similar to WT. ns, not significant. a,  $P < 0.05$  using t-test.

(E) IL17RD (Sef)- and GnRH-immunoreactive (IR) cells in E11.5 WT mouse nasal region (sagittal view).

**Table S1. Variants in FGF8 Network Genes in CHH Individuals**

|                                  | Gene      | Nucleotide change | Amino acid change | Exon                | Domain                    | Prediction Programs |               |                 |                 |          | Annotated SNP | MAF (%)  |             |             | Ethnicity              | References    |
|----------------------------------|-----------|-------------------|-------------------|---------------------|---------------------------|---------------------|---------------|-----------------|-----------------|----------|---------------|----------|-------------|-------------|------------------------|---------------|
|                                  |           |                   |                   |                     |                           | Polyphen            | SIFT          | PMut            | Mutation Taster | NNSplice |               | Controls | 1000 Genome | Individuals |                        |               |
| genes reported                   | FGF17     | c.323T>C          | p.Ile108Thr       | 4                   | FGF Core                  | probably damaging   | not tolerated | neutral         | disease causing | --       | --            | 0        | 0           | 0.1         | European               | This study    |
|                                  | FGF17     | c.530G>A          | p.Arg177His       | 5                   | FGF Core                  | probably damaging   | not tolerated | pathological    | disease causing | --       | --            | 0        | 0           | 0.1         | European               | This study    |
|                                  | FGF17     | c.560A>G          | p.Asn187Ser       | 5                   | CT                        | possibly damaging   | tolerated     | neutral         | disease causing | --       | --            | 0        | 0           | 0.1         | European               | This study    |
|                                  | IL17RD    | c.392A>C          | p.Lys131Thr       | 6                   | link b/w Ig-like & TM     | probably damaging   | not tolerated | pathological    | disease causing | --       | rs184758350   | 0.3      | 0.3         | 0.2         | European               | This study    |
|                                  | IL17RD    | c.485A>G          | p.Lys162Arg       | 7                   | Ig-like                   | benign              | tolerated     | neutral         | disease causing | --       | --            | 0        | 0           | 0.1         | European               | This study    |
|                                  | IL17RD    | c.916C>T          | p.Pro306Ser ^     | 12                  | TM                        | probably damaging   | not tolerated | pathological    | disease causing | --       | --            | 0        | 0           | 0.2         | Asian                  | This study    |
|                                  | IL17RD    | c.1136A>G         | p.Tyr379Cys       | 13                  | SEFIR                     | probably damaging   | tolerated     | pathological    | disease causing | --       | --            | 0        | 0           | 0.1         | European               | This study    |
|                                  | IL17RD    | c.1403C>T         | p.Ser468Leu       | 14                  | SEFIR                     | probably damaging   | tolerated     | pathological    | disease causing | --       | --            | 0        | 0           | 0.1         | European               | This study    |
|                                  | IL17RD    | c.1730C>A         | p.Pro577Gln ^     | 14                  | SEFIR                     | possibly damaging   | not tolerated | pathological    | disease causing | --       | --            | 0        | 0           | 0.2         | Asian                  | This study    |
| IL17RD                           | c.2204C>T | p.Ala735Val       | 15                | CT                  | benign                    | not tolerated       | pathological  | disease causing | --              | --       | 0             | 0        | 0.1         | European    | This study             |               |
| here                             | DUSP6     | c.229T>A          | p.Phe77Ile        | 1                   | Rhodanese                 | benign              | tolerated     | neutral         | disease causing | --       | --            | 0        | 0           | 0.1         | European               | This study    |
|                                  | DUSP6     | c.545C>T          | p.Ser182Phe       | 2                   | link b/w Rhodanese & DSPc | probably damaging   | not tolerated | pathological    | disease causing | --       | --            | 0        | 0           | 0.1         | European               | This study    |
|                                  | DUSP6     | c.566A>G          | p.Asn189Ser       | 2                   | link b/w Rhodanese & DSPc | benign              | tolerated     | neutral         | disease causing | --       | --            | 0        | 0           | 0.2         | European               | This study    |
|                                  | DUSP6     | c.1037C>T         | p.Thr346Met       | 3                   | DSPc                      | possibly damaging   | not tolerated | pathological    | disease causing | --       | --            | 0        | 0           | 0.1         | European               | This study    |
| be mutated in                    | SPRY4     | c.46G>A           | p.Val16Ile        | 3                   | NT                        | benign              | not tolerated | neutral         | polymorphism    | --       | --            | 0        | 0           | 0.1         | European               | This study    |
|                                  | SPRY4     | c.299C>T          | p.Thr100Met       | 3                   | link b/w PY & SpryTD      | benign              | tolerated     | pathological    | polymorphism    | --       | --            | 0        | 0           | 0.1         | European               | This study    |
|                                  | SPRY4     | c.313G>A          | p.Asp105Asn       | 3                   | link b/w PY & SpryTD      | possibly damaging   | tolerated     | neutral         | polymorphism    | --       | --            | 0        | 0           | 0.1         | European               | This study    |
|                                  | SPRY4     | c.530A>G          | p.Lys177Arg       | 3                   | link b/w PY & SpryTD      | possibly damaging   | tolerated     | neutral         | polymorphism    | --       | rs78310959    | 0        | 0.3         | 0.5         | European               | This study    |
|                                  | SPRY4     | c.626G>A          | p.Cis209Tyr       | 3                   | SpryTD                    | benign              | not tolerated | pathological    | disease causing | --       | --            | 0.3      | 0           | 0.1         | European               | This study    |
|                                  | SPRY4     | c.722C>A          | p.Ser241Tyr       | 3                   | SpryTD                    | probably damaging   | not tolerated | neutral         | disease causing | --       | rs139512218   | 0.6      | 0.8         | 0.5         | European               | This study    |
|                                  | SPRY4     | c.841G>A          | p.Val281Met       | 3                   | SpryTD                    | probably damaging   | not tolerated | neutral         | disease causing | --       | --            | 0        | 0           | 0.1         | European               | This study    |
|                                  | SPRY4     | c.910G>A          | p.Val304Ile       | 3                   | CT                        | benign              | not tolerated | neutral         | polymorphism    | --       | --            | 0        | 0           | 0.1         | Black/African American | This study    |
| CHH                              | FLRT3     | c.205C>A          | p.Gln69Lys        | 3                   | Leucine-Rich              | possibly damaging   | tolerated     | neutral         | disease causing | --       | --            | 0        | 0           | 0.1         | European               | This study    |
|                                  | FLRT3     | c.290A>G          | p.Glu97Gly        | 3                   | Leucine-Rich              | probably damaging   | not tolerated | neutral         | disease causing | --       | --            | 0        | 0           | 0.1         | European               | This study    |
|                                  | FLRT3     | c.431G>T          | p.Ser144Ile ^     | 3                   | Leucine-Rich              | probably damaging   | tolerated     | neutral         | disease causing | --       | --            | 0        | 0           | 0.2         | European               | This study    |
|                                  | FLRT3     | c.1016A>G         | p.Lys339Arg       | 3                   | CR                        | benign              | tolerated     | neutral         | disease causing | --       | --            | 0        | 0           | 0.1         | European               | This study    |
| genes known to be mutated in CHH | FGFR1     | c.232C>T          | p.Arg78Cys        | 3                   | D1                        | probably damaging   | not tolerated | pathological    | disease causing | --       | --            | 0        | 0           | 0.1         | European               | 1             |
|                                  | FGFR1     | c.296A>G          | p.Tyr99Cys        | 3                   | D1                        | probably damaging   | not tolerated | pathological    | disease causing | --       | --            | 0        | 0           | 0.1         | European               | 1, 2, 3       |
|                                  | FGFR1     | c.304G>A          | p.Val102Ile       | 3                   | D1                        | benign              | tolerated     | neutral         | polymorphism    | --       | --            | 0        | 0           | 0.1         | European               | 4             |
|                                  | FGFR1     | c.350A>G          | p.Asn117Ser       | 3                   | D1                        | benign              | tolerated     | neutral         | disease causing | --       | --            | 0        | 0           | 0.1         | European               | 3             |
|                                  | FGFR1     | c.682T>G          | p.Tyr228Asp       | 6                   | D2                        | probably damaging   | not tolerated | pathological    | disease causing | --       | --            | 0        | 0           | 0.1         | European               | 3             |
|                                  | FGFR1     | c.710G>A          | p.Gly237Asp       | 6                   | D2                        | probably damaging   | not tolerated | pathological    | disease causing | --       | --            | 0        | 0           | 0.1         | European               | 1             |
|                                  | FGFR1     | c.709G>A          | p.Gly237Ser       | 6                   | D2                        | probably damaging   | not tolerated | pathological    | disease causing | --       | --            | 0        | 0           | 0.1         | European               | 5             |
|                                  | FGFR1     | c.716T>C          | p.Ile239Thr       | 6                   | D2                        | possibly damaging   | not tolerated | neutral         | disease causing | --       | --            | 0        | 0           | 0.1         | European               | 3             |
|                                  | FGFR1     | c.749G>A          | p.Arg250Gln       | 7                   | link b/w D2 & D3          | possibly damaging   | not tolerated | pathological    | disease causing | --       | --            | 0        | 0           | 0.4         | European               | This study, 3 |
|                                  | FGFR1     | c.761G>A          | p.Arg254Gln       | 7                   | link b/w D2 & D3          | benign              | not tolerated | pathological    | disease causing | --       | --            | 0        | 0           | 0.1         | European               | 1             |
|                                  | FGFR1     | c.817G>A          | p.Val273Met       | 7                   | D3                        | probably damaging   | not tolerated | neutral         | disease causing | --       | --            | 0        | 0           | 0.1         | European               | 6             |
|                                  | FGFR1     | c.821A>G          | p.Glu274Gly       | 7                   | D3                        | possibly damaging   | not tolerated | pathological    | disease causing | --       | --            | 0        | 0           | 0.1         | European               | 1             |
|                                  | FGFR1     | c.1016A>G         | p.Tyr339Cys       | 8b                  | D3                        | probably damaging   | not tolerated | pathological    | disease causing | --       | --            | 0        | 0           | 0.1         | European               | 1             |
|                                  | FGFR1     | c.1025T>C         | p.Leu342Ser       | 8b                  | D3                        | probably damaging   | not tolerated | neutral         | disease causing | --       | --            | 0        | 0           | 0.1         | European               | 7             |
|                                  | FGFR1     | c.1037C>G         | p.Ser346Cys       | 8b                  | D3                        | probably damaging   | not tolerated | pathological    | disease causing | --       | --            | 0        | 0           | 0.1         | European               | 1             |
|                                  | FGFR1     | c.1038_1039insT   | p.Ile347fs        | 8b                  | D3                        | --                  | --            | --              | disease causing | --       | --            | 0        | 0           | 0.1         | European               | 4             |
|                                  | FGFR1     | c.1042G>A         | p.Gly348Arg       | 8b                  | D3                        | probably damaging   | not tolerated | pathological    | disease causing | --       | --            | 0        | 0           | 0.1         | European               | This study    |
|                                  | FGFR1     | c.1063T>C         | p.Trp355Arg       | 8b                  | D3                        | probably damaging   | not tolerated | pathological    | disease causing | --       | --            | 0        | 0           | 0.1         | Asian                  | This study    |
|                                  | FGFR1     | c.1097C>T         | p.Pro366Leu       | 9                   | link b/w D3 & TM          | possibly damaging   | tolerated     | pathological    | disease causing | --       | --            | 0        | 0           | 0.1         | Asian                  | 8             |
| FGFR1                            | c.1279G>T | p.Val427Leu       | 9                 | FRS2 binding domain | possibly damaging         | tolerated           | neutral       | disease causing | --              | --       | 0             | 0        | 0.1         | European    | 4                      |               |
| FGFR1                            | c.1286T>A | p.Val429Glu ^     | 10                | FRS2 binding domain | probably damaging         | not tolerated       | pathological  | disease causing | --              | --       | 0             | 0        | 0.2         | European    | 4                      |               |
| FGFR1                            | c.1409G>T | p.Arg470Leu       | 10                | TK                  | benign                    | tolerated           | pathological  | disease causing | --              | --       | 0             | 0        | 0.1         | European    | 7                      |               |
| FGFR1                            | c.1447C>A | p.Pro483Thr       | 11                | TK                  | probably damaging         | tolerated           | pathological  | disease causing | --              | --       | 0             | 0        | 0.1         | European    | This study             |               |

|                                                     |                |                         |                          |                                |                      |                      |               |                    |                                    |                              |             |     |     |          |                     |            |
|-----------------------------------------------------|----------------|-------------------------|--------------------------|--------------------------------|----------------------|----------------------|---------------|--------------------|------------------------------------|------------------------------|-------------|-----|-----|----------|---------------------|------------|
| g<br>e<br>n<br>e<br>s                               | FGFR1          | c.1553-2A>G             | --                       | Intron<br>b/w<br>exon<br>11,12 | --                   | --                   | --            | disease<br>causing | Loss<br>splice<br>acceptor<br>site | --                           | 0           | 0   | 0.1 | European | 4                   |            |
|                                                     | FGFR1          | c.1755C>A               | p.Tyr585*                | 13                             | TK                   | --                   | --            | --                 | disease<br>causing                 | --                           | --          | 0   | 0   | 0.1      | European            | 1          |
|                                                     | FGFR1          | c.1854G>T               | p.Lys618Asn              | 13                             | TK                   | probably<br>damaging | not tolerated | pathological       | disease<br>causing                 | Loss<br>splice<br>donor site | --          | 0   | 0   | 0.1      | European            | 3          |
|                                                     | FGFR1          | c.1864C>T               | p.Arg622*                | 14                             | TK                   | --                   | --            | --                 | disease<br>causing                 | --                           | --          | 0   | 0   | 0.2      | European            | 2          |
|                                                     | FGFR1          | c.2008G>A               | p.Glu670Lys              | 15                             | TK                   | probably<br>damaging | not tolerated | pathological       | disease<br>causing                 | --                           | --          | 0   | 0   | 0.1      | European            | This study |
|                                                     | FGFR1          | c.2011G>C               | p.Ala671Pro              | 15                             | TK                   | probably<br>damaging | not tolerated | pathological       | disease<br>causing                 | --                           | --          | 0   | 0   | 0.1      | European            | 3          |
|                                                     | FGFR1          | c.2038C>T               | p.Gln680*                | 15                             | TK                   | --                   | --            | --                 | disease<br>causing                 | --                           | --          | 0   | 0   | 0.1      | European            | 5          |
|                                                     | FGFR1          | c.2059G>A               | p.Gly687Arg              | 16                             | TK                   | probably<br>damaging | not tolerated | pathological       | disease<br>causing                 | --                           | --          | 0   | 0   | 0.1      | European            | 9          |
|                                                     | FGFR1          | c.2075A>G               | p.Glu692Gly              | 16                             | TK                   | probably<br>damaging | not tolerated | pathological       | disease<br>causing                 | --                           | --          | 0   | 0   | 0.1      | European            | 10         |
|                                                     | FGFR1          | c.2107G>C               | p.Gly703Arg              | 16                             | TK                   | probably<br>damaging | not tolerated | pathological       | disease<br>causing                 | --                           | --          | 0   | 0   | 0.1      | European            | 1          |
|                                                     | FGFR1          | c.2165C>A               | p.Pro722His              | 16                             | TK                   | probably<br>damaging | not tolerated | pathological       | disease<br>causing                 | --                           | --          | 0   | 0   | 0.1      | European            | 5          |
| FGFR1                                               | c.2172C>G      | p.Asn724Lys             | 16                       | TK                             | possibly<br>damaging | not tolerated        | pathological  | disease<br>causing | --                                 | --                           | 0           | 0   | 0.1 | European | 5                   |            |
| FGFR1                                               | c.2302G>T      | p.Asp768Tyr             | 18                       | CT                             | probably<br>damaging | not tolerated        | pathological  | disease<br>causing | --                                 | --                           | 0           | 0   | 0.1 | European | 11                  |            |
| k<br>n<br>o<br>w<br>n                               | FGF8           | c.40C>A                 | p.His14Asn               | 1b                             | NT                   | possibly<br>damaging | not tolerated | neutral            | disease<br>causing                 | --                           | --          | 0   | 0   | 0.1      | European            | 12         |
|                                                     | FGF8           | c.77C>T                 | p.Pro26Leu               | 1c                             | NT                   | benign               | not tolerated | neutral            | polymorphism                       | --                           | rs137852660 | 0.3 | 0.1 | 0.1      | European            | 12         |
|                                                     | FGF8           | c.118T>C                | p.Phe40Leu <sup>A</sup>  | 1c                             | NT                   | benign               | tolerated     | neutral            | polymorphism                       | --                           | --          | 0   | 0   | 0.2      | European            | 12         |
|                                                     | FGF8           | c.298A>G                | p.Lys100Glu              | 1d                             | core FGF binding     | possibly<br>damaging | tolerated     | pathological       | disease<br>causing                 | --                           | --          | 0   | 0   | 0.1      | European            | 12         |
|                                                     | FGF8           | c.379C>G                | p.Arg127Gly              | 2                              | core FGF binding     | probably<br>damaging | tolerated     | pathological       | disease<br>causing                 | --                           | --          | 0   | 0   | 0.1      | European            | 12         |
| t<br>o<br>b<br>e<br>m<br>u<br>t<br>a<br>t<br>e<br>d | KAL1           | c.113C>A                | p.Ser38 <sup>B</sup>     | 1                              | CR                   | --                   | --            | --                 | disease<br>causing                 | --                           | --          | 0   | 0   | 0.2      | European            | 4          |
|                                                     | KAL1           | c.161T>G                | p.Leu54Arg <sup>B</sup>  | 1                              | CR                   | possibly<br>damaging | not tolerated | neutral            | polymorphism                       | --                           | --          | 0   | 0   | 0.2      | European            | 4          |
|                                                     | KAL1           | c.393G>T                | p.Gln131His <sup>A</sup> | 2                              | CR                   | probably<br>damaging | not tolerated | neutral            | disease<br>causing                 | --                           | --          | 0   | 0   | 0.4      | European            | 4          |
|                                                     | KAL1           | c.514T>C                | p.Cys172Arg <sup>B</sup> | 4                              | WAP                  | probably<br>damaging | tolerated     | pathological       | disease<br>causing                 | --                           | --          | 0   | 0   | 0.2      | European            | 13         |
|                                                     | KAL1           | c.555G>C                | p.Lys185Asn              | 5                              | FnIII-1              | probably<br>damaging | tolerated     | neutral            | disease<br>causing                 | --                           | --          | 0   | 0   | 0.2      | European            | 4          |
|                                                     | KAL1           | c.571C>T                | p.Arg191 <sup>B</sup>    | 5                              | FnIII-1              | --                   | --            | --                 | disease<br>causing                 | --                           | --          | 0   | 0   | 0.2      | European            | 14, 6, 13  |
|                                                     | KAL1           | c.769C>T                | p.Arg257 <sup>B</sup>    | 6                              | FnIII-1              | --                   | --            | --                 | disease<br>causing                 | --                           | --          | 0   | 0   | 0.2      | European            | 15         |
|                                                     | KAL1           | c.814C>T                | p.Arg272*                | 6                              | FnIII-1              | --                   | --            | --                 | disease<br>causing                 | --                           | --          | 0   | 0   | 0.2      | European            | This study |
|                                                     | KAL1           | c.829C>A                | p.Pro277Thr              | 6                              | FnIII-1              | probably<br>damaging | not tolerated | neutral            | disease<br>causing                 | --                           | --          | 0   | 0   | 0.2      | European            | 4          |
|                                                     | KAL1           | c.1201_12011del         | p.Asn400fs <sup>B</sup>  | 8                              | FnIII-2              | --                   | --            | --                 | disease<br>causing                 | --                           | --          | 0   | 0   | 0.2      | European            | 4          |
|                                                     | KAL1           | c.1267C>T               | p.Arg423 <sup>B</sup>    | 9                              | FnIII-3              | --                   | --            | --                 | disease<br>causing                 | --                           | --          | 0   | 0   | 0.2      | European            | 6, 16      |
|                                                     | KAL1           | c.1369C>T               | p.Arg457 <sup>B</sup>    | 10                             | FnIII-3              | --                   | --            | --                 | disease<br>causing                 | --                           | --          | 0   | 0   | 0.2      | European            | 6, 13      |
|                                                     | KAL1           | c.1424C>A               | p.Ser475 <sup>B</sup>    | 10                             | FnIII-3              | --                   | --            | --                 | disease<br>causing                 | --                           | --          | 0   | 0   | 0.2      | European            | 4          |
|                                                     | KAL1           | c.1627G>A               | p.Val543Ile <sup>B</sup> | 12                             | FnIII-4              | benign               | tolerated     | neutral            | polymorphism                       | --                           | --          | 0   | 0   | 0.6      | European            | 4          |
| KAL1                                                | c.1627G>A      | p.Val543Ile             | 12                       | FnIII-4                        | benign               | tolerated            | neutral       | polymorphism       | --                                 | --                           | 0           | 0   | 0.6 | European | 4                   |            |
| KAL1                                                | c.1756C>T      | p.Gln586 <sup>B</sup>   | 12                       | FnIII-4                        | --                   | --                   | --            | disease<br>causing | --                                 | --                           | 0           | 0   | 0.2 | European | This study          |            |
| KAL1                                                | c.1759G>T      | p.Val587Leu             | 12                       | FnIII-4                        | probably<br>damaging | tolerated            | pathological  | disease<br>causing | --                                 | rs137900287                  | 0.4         | 0.2 | 0.2 | European | 4                   |            |
| KAL1                                                | c.1800del      | p.Leu601fs <sup>B</sup> | 12                       | FnIII-4                        | --                   | --                   | --            | disease<br>causing | --                                 | --                           | 0           | 0   | 0.2 | European | 4                   |            |
| KAL1                                                | c.1887_1888del | p.Leu629fs <sup>B</sup> | 13                       | FnIII-4                        | --                   | --                   | --            | disease<br>causing | --                                 | --                           | 0           | 0   | 0.2 | European | 4                   |            |
| C<br>H<br>H                                         | HS6ST1         | c.916C>T                | p.Arg306Trp <sup>A</sup> | 2                              | Sulfotransferase     | probably<br>damaging | not tolerated | pathological       | disease<br>causing                 | --                           | --          | 0   | 0   | 0.2      | European            | 17         |
|                                                     | HS6ST1         | c.917G>A                | p.Arg306Gln              | 2                              | Sulfotransferase     | probably<br>damaging | tolerated     | neutral            | disease<br>causing                 | --                           | --          | 0   | 0   | 0.1      | European            | 17         |
|                                                     | HS6ST1         | c.968G>A                | p.Arg323Gln              | 2                              | Sulfotransferase     | probably<br>damaging | not tolerated | pathological       | disease<br>causing                 | --                           | --          | 0   | 0   | 0.1      | European            | 17         |
|                                                     | HS6ST1         | c.1144C>T               | p.Arg382Trp              | 2                              | CT                   | probably<br>damaging | not tolerated | pathological       | disease<br>causing                 | --                           | --          | 0   | 0   | 0.4      | European &<br>Asian | 17         |
|                                                     | HS6ST1         | c.1210A>G               | p.Met404Val              | 2                              | CT                   | benign               | tolerated     | neutral            | disease<br>causing                 | --                           | --          | 0   | 0   | 0.1      | European            | 17         |

SNP= single-nucleotide polymorphism, MAF= minor allele frequency, A= homozygous, B= hemizygous, b/w= between, CT= C-terminus, NT= N-terminus, TM= Transmembrane domain, Ig-like= Immunoglobulin-like domain, SEFIR= SEF/IL-17R domain, DSPc= Dual Specificity Phosphatases domain, PY= Phosphotyrosine-binding domain, SpryTD= Spry Translocation domain, CR= Cysteine rich domain, D1= Domain 1, D2= Domain 2, D3=Domain 3, TK= Tyrosine Kinase domain, WAP= whey acidic protein, FN III= Fibronectin type-III domain.

**Table S2. Synonymous Changes in FGF8 Network Genes in CHH Individuals**

|                                                       | Gene                                | Nucleotide change | Amino acid change | Exon             | Domain                 | NN Splice | Annotated SNP | MAF (%)  |              |             | Ethnicity              | References |
|-------------------------------------------------------|-------------------------------------|-------------------|-------------------|------------------|------------------------|-----------|---------------|----------|--------------|-------------|------------------------|------------|
|                                                       |                                     |                   |                   |                  |                        |           |               | Controls | 1000 Genomes | Individuals |                        |            |
| g r e o p o b i n e t n e m e d u t h a H e t r e e d | <i>FGF17</i>                        | c.87G>T           | p.Pro29Pro        | 3                | link b/w SP & FGF Core | --        | --            | 0        | 0            | 0.2         | European               | This study |
|                                                       | <i>FGF17</i>                        | c.255G>A          | p.Lys85Lys        | 4                | FGF Core               | --        | --            | 0        | 0            | 0.1         | European               | This study |
|                                                       | <i>FGF17</i>                        | c.294C>T          | p.Arg98Arg        | 4                | FGF Core               | --        | --            | 0        | 0            | 0.1         | European               | This study |
|                                                       | <i>FGF17</i>                        | c.429C>T          | p.Asn143Asn       | 5                | FGF Core               | --        | --            | 0        | 0            | 0.1         | European               | This study |
|                                                       | <i>FGF17</i>                        | c.597C>T          | p.Gly199Gly       | 5                | CT                     | --        | rs147413881   | 0.3      | 0.4          | 0.1         | European               | This study |
|                                                       | <i>IL17RD</i>                       | c.1209G>A         | p.Gly403Gly       | 14               | SEFIR                  | --        | --            | 0        | 0            | 0.1         | European               | This study |
|                                                       | <i>DUSP6</i>                        | c.957C>T          | p.Ala319Ala       | 3                | DSPc                   | --        | rs148295375   | 0        | 0            | 0.1         | Black/African American | This study |
|                                                       | <i>SPRY4</i>                        | c.300G>A          | p.Thr100Thr       | 3                | link b/w PY & SpryTD   | --        | rs143709567   | 0        | 0.1          | 0.5         | European               | This study |
|                                                       | <i>SPRY4</i>                        | c.306C>T          | p.Ala102Ala       | 3                | link b/w PY & SpryTD   | --        | --            | 0        | 0            | 0.1         | European               | This study |
|                                                       | <i>SPRY4</i>                        | c.459C>T          | p.Arg153Arg       | 3                | link b/w PY & SpryTD   | --        | --            | 0        | 0            | 0.1         | European               | This study |
|                                                       | <i>SPRY4</i>                        | c.735C>T          | p.His245His       | 3                | SpryTD                 | --        | --            | 0        | 0            | 0.1         | European               | This study |
|                                                       | <i>FLRT3</i>                        | c.831T>C          | p.Asp277Asp       | 3                | Leucine-Rich           | --        | rs149124349   | 0        | 0.5          | 0.2         | European               | This study |
|                                                       | g b e n e s u t C k a H n o e d i n | <i>FGFR1</i>      | c.273C>T          | p.Ser91Ser       | 3                      | D1        | --            | --       | 0            | 0           | 0.1                    | European   |
| <i>FGFR1</i>                                          |                                     | c.336C>T          | p.Thr112Thr       | 3                | D1                     | --        | rs148480919   | 0        | 0            | 0.1         | European               | This study |
| <i>FGFR1</i>                                          |                                     | c.1098G>A         | p.Pro366Pro       | 9                | link b/w D3 & TM       | --        | rs56174879    | 0        | 0            | 0.1         | European               | This study |
| <i>FGFR1</i>                                          |                                     | c.1134C>T         | p.Ile378Ile       | 9                | TM                     | --        | --            | 0.3      | 0            | 0.1         | European               | 5          |
| <i>FGFR1</i>                                          |                                     | c.2067C>T         | p.Leu689Leu       | 16               | TK                     | --        | --            | 0        | 0            | 0.1         | European               | This study |
| <i>FGF8</i>                                           |                                     | c.336C>T          | p.Phe112Phe       | 1D               | NT                     | --        | --            | 0        | 0            | 0.1         | European               | 4          |
| <i>FGF8</i>                                           |                                     | c.379C>A          | p.Arg127Arg       | 2                | NT                     | --        | --            | 0        | 0            | 0.1         | European               | 4          |
| <i>FGF8</i>                                           |                                     | c.402C>A          | p.Gly134Gly       | 2                | NT                     | --        | --            | 0        | 0            | 0.1         | European               | 4          |
| <i>FGF8</i>                                           |                                     | c.582G>A          | p.Thr194Thr       | 3                | NT                     | --        | --            | 0.3      | 0            | 0.1         | European               | 4          |
| <i>FGF8</i>                                           |                                     | c.681C>T          | p.Pro227Pro       | 3                | CT                     | --        | --            | 0        | 0            | 0.1         | European               | 4          |
| <i>KAL1</i>                                           |                                     | c.231C>T          | p.Cys77Cys        | 2                | CR                     | --        | --            | 0        | 0            | 0.2         | European               | 4          |
| <i>KAL1</i>                                           |                                     | c.666A>G          | p.Arg222Arg       | 5                | FnIII-1                | --        | --            | 0        | 0            | 0.2         | European               | 4          |
| <i>KAL1</i>                                           |                                     | c.1953G>A         | p.Arg651Arg       | 13               | FnIII-4                | --        | --            | 0        | 0            | 0.2         | European               | 4          |
| <i>HS6ST1</i>                                         | c.549G>A                            | p.Leu183Leu       | 2                 | Sulfotransferase | --                     | --        | 0             | 0        | 0.1          | European    | This study             |            |
| <i>HS6ST1</i>                                         | c.882C>T                            | p.Thr294Thr       | 2                 | Sulfotransferase | --                     | --        | 0.3           | 0        | 0.1          | European    | This study             |            |

SNP= single-nucleotide polymorphism, MAF= minor allele frequency, b/w= between, SP= Signal Peptide, CT= C-terminus, SEFIR= SEF/IL-17R domain, DSPc= Dual Specificity Phosphatases domain, PY= Phosphotyrosine-binding domain, SpryTD= Spry Translocation domain, D1= Domain 1, D2= Domain 2, D3=Domain 3, TM= Transmembrane domain, TK= Tyrosine Kinase domain, NT= N-terminus, CR= Cysteine Rich domain, FN III= Fibronectin type-III domain.

**Table S3. Variants in the Cohort of 350 CHH Individuals of European Descent**

| Case # | Dx   | Sex | # of genes with variants | # of alleles with variants | Gene          | Nucleotide change | Amino acid change | Variant type | Genotype     | MAF in controls (%) | MAF in individuals (%) |
|--------|------|-----|--------------------------|----------------------------|---------------|-------------------|-------------------|--------------|--------------|---------------------|------------------------|
| 1      | KS   | F   | 4                        | 6                          | <i>FGFR1</i>  | c.749G>A          | p.Arg250Gln       | missense     | heterozygous | 0                   | 0.4                    |
|        |      |     |                          |                            | <i>FGF17</i>  | c.323T>C          | p.Ile108Thr       | missense     | heterozygous | 0                   | 0.1                    |
|        |      |     |                          |                            | <i>FLRT3</i>  | c.290A>G          | p.Glu97Gly        | missense     | heterozygous | 0                   | 0.1                    |
|        |      |     |                          |                            | <i>FLRT3</i>  | c.431G>T          | p.Ser144Ile       | missense     | homozygous   | 0                   | 0.2                    |
|        |      |     |                          |                            | <i>HS6ST1</i> | c.916C>T          | p.Arg306Trp       | missense     | homozygous   | 0                   | 0.2                    |
| 2      | nIHH | F   | 3                        | 3                          | <i>FGFR1</i>  | c.716T>C          | p.Ile239Thr       | missense     | heterozygous | 0                   | 0.1                    |
|        |      |     |                          |                            | <i>PROKR2</i> | c.604A>G          | p.Ser202Gly       | missense     | heterozygous | 0                   | 0.1                    |
|        |      |     |                          |                            | <i>GNRH1</i>  | c.91C>T           | p.Arg31Cys        | missense     | heterozygous | 0                   | 0.1                    |
| 3      | nIHH | F   | 2                        | 3                          | <i>FGFR1</i>  | c.1409G>T         | p.Arg470Leu       | missense     | heterozygous | 0                   | 0.1                    |
|        |      |     |                          |                            | <i>GNRHR</i>  | c.317A>G          | p.Gln106Arg       | missense     | heterozygous | 0.3                 | 1.8                    |
|        |      |     |                          |                            | <i>GNRHR</i>  | c.785G>A          | p.Arg262Gln       | missense     | heterozygous | 0                   | 0.5                    |
| 4      | nIHH | F   | 2                        | 3                          | <i>FGFR1</i>  | c.350A>G          | p.Asn117Ser       | missense     | heterozygous | 0                   | 0.1                    |
|        |      |     |                          |                            | <i>GNRHR</i>  | c.247C>G          | p.Leu83Val        | missense     | heterozygous | 0                   | 0.1                    |
|        |      |     |                          |                            | <i>GNRHR</i>  | c.317A>G          | p.Gln106Arg       | missense     | heterozygous | 0.3                 | 1.8                    |
| 5      | nIHH | F   | 2                        | 3                          | <i>FGFR1</i>  | c.2165C>A         | p.Pro722His       | missense     | heterozygous | 0                   | 0.1                    |
|        |      |     |                          |                            | <i>FGFR1</i>  | c.2172C>G         | p.Asn724Lys       | missense     | heterozygous | 0                   | 0.1                    |
|        |      |     |                          |                            | <i>TACR3</i>  | c.857A>G          | p.Lys286Arg       | missense     | heterozygous | 0.3                 | 0.4                    |
| 6      | nIHH | M   | 2                        | 3                          | <i>FGFR1</i>  | c.2302G>T         | p.Asp768Tyr       | missense     | heterozygous | 0                   | 0.1                    |
|        |      |     |                          |                            | <i>FGF8</i>   | c.118T>C          | p.Phe40Leu        | missense     | homozygous   | 0                   | 0.2                    |
| 7      | nIHH | M   | 2                        | 2                          | <i>FGFR1</i>  | c.749G>A          | p.Arg250Gln       | missense     | heterozygous | 0                   | 0.4                    |
|        |      |     |                          |                            | <i>FGF8</i>   | c.298A>G          | p.Lys100Glu       | missense     | heterozygous | 0                   | 0.1                    |
| 8      | nIHH | M   | 2                        | 2                          | <i>FGFR1</i>  | c.1854G>T         | p.Lys618Asn       | missense     | heterozygous | 0                   | 0.1                    |
|        |      |     |                          |                            | <i>GNRHR</i>  | c.785G>A          | p.Arg262Gln       | missense     | heterozygous | 0                   | 0.5                    |
| 9      | nIHH | F   | 2                        | 2                          | <i>FGFR1</i>  | c.682T>G          | p.Tyr228Asp       | missense     | heterozygous | 0                   | 0.1                    |
|        |      |     |                          |                            | <i>KISS1R</i> | c.565G>A          | p.Ala189Thr       | missense     | heterozygous | 0                   | 0.1                    |
| 10     | KS   | M   | 2                        | 2                          | <i>FGFR1</i>  | c.1025T>C         | p.Leu342Ser       | missense     | heterozygous | 0                   | 0.1                    |
|        |      |     |                          |                            | <i>NSMF</i>   | c.1165-14_22del   | -                 | splice site  | heterozygous | 0                   | 0.1                    |
| 11     | KS   | M   | 2                        | 2                          | <i>FGFR1</i>  | c.1864C>T         | p.Arg622*         | nonsense     | heterozygous | 0                   | 0.2                    |
|        |      |     |                          |                            | <i>NSMF</i>   | c.587G>A          | p.Arg196His       | missense     | heterozygous | 0                   | 0.1                    |
| 12     | KS   | M   | 2                        | 2                          | <i>FGFR1</i>  | c.1447C>A         | p.Pro483Thr       | missense     | heterozygous | 0                   | 0.1                    |
|        |      |     |                          |                            | <i>SPRY4</i>  | c.722C>A          | p.Ser241Tyr       | missense     | heterozygous | 0.6                 | 0.5                    |
| 13     | KS   | F   | 2                        | 2                          | <i>FGFR1</i>  | c.1042G>A         | p.Gly348Arg       | missense     | heterozygous | 0                   | 0.1                    |
|        |      |     |                          |                            | <i>IL17RD</i> | c.1136A>G         | p.Tyr379Cys       | missense     | heterozygous | 0                   | 0.1                    |
| 14     | KS   | F   | 2                        | 2                          | <i>FGFR1</i>  | c.2008G>A         | p.Glu670Lys       | missense     | heterozygous | 0                   | 0.1                    |
|        |      |     |                          |                            | <i>FLRT3</i>  | c.205C>A          | p.Gln69Lys        | missense     | heterozygous | 0                   | 0.1                    |
| 15     | nIHH | F   | 2                        | 2                          | <i>FGFR1</i>  | c.1553-2A>G       | -                 | splice site  | heterozygous | 0                   | 0.1                    |
|        |      |     |                          |                            | <i>KAL1</i>   | c.1759G>T         | p.Val587Leu       | missense     | heterozygous | 0.4                 | 0.2                    |
| 16     | KS   | M   | 2                        | 2                          | <i>FGFR1</i>  | c.2075A>G         | p.Glu692Gly       | missense     | heterozygous | 0                   | 0.1                    |
|        |      |     |                          |                            | <i>DUSP6</i>  | c.545C>T          | p.Ser182Phe       | missense     | heterozygous | 0                   | 0.1                    |
| 17     | KS   | F   | 2                        | 2                          | <i>FGFR1</i>  | c.1755C>A         | p.Tyr585*         | nonsense     | heterozygous | 0                   | 0.1                    |
|        |      |     |                          |                            | <i>TACR3</i>  | c.1091G>A         | p.Arg364Gln       | missense     | heterozygous | 0                   | 0.1                    |
| 18     | KS   | F   | 2                        | 2                          | <i>DUSP6</i>  | c.566A>G          | p.Asn189Ser       | missense     | heterozygous | 0                   | 0.2                    |
|        |      |     |                          |                            | <i>SPRY4</i>  | c.722C>A          | p.Ser241Tyr       | missense     | heterozygous | 0.6                 | 0.5                    |
| 19     | KS   | F   | 2                        | 2                          | <i>DUSP6</i>  | c.1037C>T         | p.Thr346Met       | missense     | heterozygous | 0                   | 0.1                    |
|        |      |     |                          |                            | <i>SPRY4</i>  | c.722C>A          | p.Ser241Tyr       | missense     | heterozygous | 0.6                 | 0.5                    |
| 20     | nIHH | F   | 2                        | 2                          | <i>SPRY4</i>  | c.722C>A          | p.Ser241Tyr       | missense     | heterozygous | 0.6                 | 0.5                    |
|        |      |     |                          |                            | <i>TACR3</i>  | c.1345G>A         | p.Ala449Thr       | missense     | heterozygous | 0.6                 | 0.5                    |
| 21     | KS   | M   | 2                        | 2                          | <i>IL17RD</i> | c.2204C>T         | p.Ala735Val       | missense     | heterozygous | 0                   | 0.1                    |
|        |      |     |                          |                            | <i>KISS1R</i> | c.581C>A          | p.Ala194Asp       | missense     | heterozygous | 0                   | 0.1                    |
| 22     | nIHH | F   | 2                        | 2                          | <i>HS6ST1</i> | c.1144C>T         | p.Arg382Trp       | missense     | heterozygous | 0                   | 0.2                    |
|        |      |     |                          |                            | <i>TAC3</i>   | c.238C>A          | p.Arg80Ser        | missense     | heterozygous | 0                   | 0.1                    |
| 23     | KS   | M   | 2                        | 2                          | <i>KAL1</i>   | c.571C>T          | p.Arg191*         | nonsense     | hemizygous   | 0                   | 0.2                    |
|        |      |     |                          |                            | <i>TACR3</i>  | c.1345G>A         | p.Ala449Thr       | missense     | heterozygous | 0.6                 | 0.5                    |
| 24     | KS   | F   | 2                        | 2                          | <i>PROKR2</i> | c.70G>C           | p.Ala24Pro        | missense     | heterozygous | 0                   | 0.1                    |
|        |      |     |                          |                            | <i>PROKR2</i> | c.343G>A          | p.Val115Met       | missense     | heterozygous | 0                   | 0.1                    |
| 25     | nIHH | F   | 1                        | 2                          | <i>GNRHR</i>  | c.30T>A           | p.Asn10Lys        | missense     | heterozygous | 0                   | 0.1                    |
|        |      |     |                          |                            | <i>GNRHR</i>  | c.31C>A           | p.Gln11Lys        | missense     | heterozygous | 0                   | 0.1                    |
|        |      |     |                          |                            | <i>GNRHR</i>  | c.959C>T          | p.Pro320Leu       | missense     | heterozygous | 0                   | 0.1                    |
| 26     | nIHH | M   | 1                        | 2                          | <i>GNRHR</i>  | c.317A>G          | p.Gln106Arg       | missense     | homozygous   | 0.2                 | 1.8                    |
|        |      |     |                          |                            | <i>GNRHR</i>  | c.651C>A          | p.Ser217Arg       | missense     | heterozygous | 0                   | 0.1                    |
| 27     | KS   | M   | 1                        | 2                          | <i>GNRHR</i>  | c.286C>T          | p.Pro96Ser        | missense     | heterozygous | 0                   | 0.1                    |
|        |      |     |                          |                            | <i>GNRHR</i>  | c.317A>G          | p.Gln106Arg       | missense     | heterozygous | 0.2                 | 1.8                    |
| 28     | KS   | F   | 1                        | 2                          | <i>KAL1</i>   | c.393G>T          | p.Gln131His       | missense     | homozygous   | 0                   | 0.4                    |
|        |      |     |                          |                            | <i>KAL1</i>   | c.829C>A          | p.Pro277Thr       | missense     | heterozygous | 0                   | 0.2                    |

|     |      |   |   |    |               |                 |             |            |              |     |     |
|-----|------|---|---|----|---------------|-----------------|-------------|------------|--------------|-----|-----|
| 29  | nIHH | M | 1 | 2  | <i>GNRHR</i>  | c.317A>G        | p.Gln106Arg | missense   | homozygous   | 0.2 | 1.8 |
| 30  | KS   | F | 1 | 2  | <i>GNRHR</i>  | c.317A>G        | p.Gln106Arg | missense   | homozygous   | 0.2 | 1.8 |
| 31  | nIHH | F | 1 | 2  | <i>GNRHR</i>  | c.785G>A        | p.Arg262Gln | missense   | homozygous   | 0   | 0.5 |
| 32  | KS   | M | 1 | 2  | <i>FGFR1</i>  | c.1286T>A       | p.Val429Glu | missense   | homozygous   | 0   | 0.2 |
| 33  | nIHH | M | 1 | 2  | <i>KISS1R</i> | c.443T>C        | p.Leu148Ser | missense   | homozygous   | 0   | 0.2 |
| 34  | KS   | M | 1 | 2  | <i>PROK2</i>  | c.163del        | p.Ile55fs   | frameshift | homozygous   | 0   | 0.2 |
| 35  | nIHH | M | 1 | 2  | <i>TACR3</i>  | c.80C>A         | p.Ser27*    | nonsense   | homozygous   | 0   | 0.2 |
| 36  | nIHH | M | 1 | 2  | <i>TACR3</i>  | c.1057C>T       | p.Pro353Ser | missense   | homozygous   | 0   | 0.2 |
| 37  | nIHH | M | 1 | 2  | <i>TACR3</i>  | c.824G>A        | p.Trp275*   | nonsense   | homozygous   | 0   | 0.7 |
| 38  | nIHH | M | 1 | 2  | <i>TACR3</i>  | c.766T>C        | p.Tyr256His | missense   | homozygous   | 0   | 0.2 |
| 39  | KS   | M | 1 | 1* | <i>KAL1</i>   | c.113C>A        | p.Ser38*    | nonsense   | hemizygous   | 0   | 0.2 |
| 40  | KS   | M | 1 | 1* | <i>KAL1</i>   | c.161T>G        | p.Leu54Arg  | missense   | hemizygous   | 0   | 0.2 |
| 41  | KS   | M | 1 | 1* | <i>KAL1</i>   | c.514T>C        | p.Cys172Arg | missense   | hemizygous   | 0   | 0.2 |
| 42  | KS   | M | 1 | 1* | <i>KAL1</i>   | c.769C>T        | p.Arg257*   | nonsense   | hemizygous   | 0   | 0.2 |
| 43  | KS   | M | 1 | 1* | <i>KAL1</i>   | c.814C>T        | p.Arg272*   | nonsense   | hemizygous   | 0   | 0.2 |
| 44  | KS   | M | 1 | 1* | <i>KAL1</i>   | c.1201_12011del | p.Asn400fs  | frameshift | hemizygous   | 0   | 0.2 |
| 45  | KS   | M | 1 | 1* | <i>KAL1</i>   | c.1267C>T       | p.Arg423*   | nonsense   | hemizygous   | 0   | 0.2 |
| 46  | KS   | M | 1 | 1* | <i>KAL1</i>   | c.1369C>T       | p.Arg457*   | nonsense   | hemizygous   | 0   | 0.2 |
| 47  | KS   | M | 1 | 1* | <i>KAL1</i>   | c.1369C>T       | p.Arg457*   | nonsense   | hemizygous   | 0   | 0.2 |
| 48  | KS   | M | 1 | 1* | <i>KAL1</i>   | c.1424C>A       | p.Ser475*   | nonsense   | hemizygous   | 0   | 0.2 |
| 49  | KS   | M | 1 | 1* | <i>KAL1</i>   | c.1627G>Al      | p.Val543Ile | missense   | hemizygous   | 0   | 0.4 |
| 50  | KS   | M | 1 | 1* | <i>KAL1</i>   | c.1627G>Al      | p.Val543Ile | missense   | hemizygous   | 0   | 0.4 |
| 51  | KS   | M | 1 | 1* | <i>KAL1</i>   | c.1756C>T       | p.Gln586*   | nonsense   | hemizygous   | 0   | 0.2 |
| 52  | KS   | M | 1 | 1* | <i>KAL1</i>   | c.1800del       | p.Leu601fs  | frameshift | hemizygous   | 0   | 0.2 |
| 53  | KS   | M | 1 | 1* | <i>KAL1</i>   | c.1887_1888del  | p.Leu629fs  | frameshift | hemizygous   | 0   | 0.2 |
| 54  | nIHH | F | 1 | 1  | <i>FGF8</i>   | c.40C>A         | p.His14Asn  | missense   | heterozygous | 0   | 0.1 |
| 55  | KS   | M | 1 | 1  | <i>FGF8</i>   | c.77C>T         | p.Pro26Leu  | missense   | heterozygous | 0.3 | 0.1 |
| 56  | KS   | F | 1 | 1  | <i>FGF8</i>   | c.379C>G        | p.Arg127Gly | missense   | heterozygous | 0   | 0.1 |
| 57  | nIHH | M | 1 | 1  | <i>FGF17</i>  | c.530G>A        | p.Arg177His | missense   | heterozygous | 0   | 0.1 |
| 58  | KS   | M | 1 | 1  | <i>FGF17</i>  | c.560A>G        | p.Asn187Ser | missense   | heterozygous | 0   | 0.1 |
| 59  | KS   | M | 1 | 1  | <i>FGFR1</i>  | c.232C>T        | p.Arg78Cys  | missense   | heterozygous | 0   | 0.1 |
| 60  | nIHH | M | 1 | 1  | <i>FGFR1</i>  | c.296A>G        | p.Tyr99Cys  | missense   | heterozygous | 0   | 0.1 |
| 61  | KS   | M | 1 | 1  | <i>FGFR1</i>  | c.304G>A        | p.Val102Ile | missense   | heterozygous | 0   | 0.1 |
| 62  | KS   | F | 1 | 1  | <i>FGFR1</i>  | c.710G>A        | p.Gly237Asp | missense   | heterozygous | 0   | 0.1 |
| 63  | KS   | M | 1 | 1  | <i>FGFR1</i>  | c.709G>A        | p.Gly237Ser | missense   | heterozygous | 0   | 0.1 |
| 64  | nIHH | F | 1 | 1  | <i>FGFR1</i>  | c.749G>A        | p.Arg250Gln | missense   | heterozygous | 0   | 0.4 |
| 65  | KS   | M | 1 | 1  | <i>FGFR1</i>  | c.761G>A        | p.Arg254Gln | missense   | heterozygous | 0   | 0.1 |
| 66  | KS   | M | 1 | 1  | <i>FGFR1</i>  | c.817G>A        | p.Val273Met | missense   | heterozygous | 0   | 0.1 |
| 67  | KS   | M | 1 | 1  | <i>FGFR1</i>  | c.821A>G        | p.Glu274Gly | missense   | heterozygous | 0   | 0.1 |
| 68  | KS   | M | 1 | 1  | <i>FGFR1</i>  | c.1016A>G       | p.Tyr339Cys | missense   | heterozygous | 0   | 0.1 |
| 69  | KS   | M | 1 | 1  | <i>FGFR1</i>  | c.1037C>G       | p.Ser346Cys | missense   | heterozygous | 0   | 0.1 |
| 70  | KS   | M | 1 | 1  | <i>FGFR1</i>  | c.1038_1039insT | p.Ile347fs  | frameshift | heterozygous | 0   | 0.1 |
| 71  | nIHH | F | 1 | 1  | <i>FGFR1</i>  | c.1279G>T       | p.Val427Leu | missense   | heterozygous | 0   | 0.1 |
| 72  | nIHH | F | 1 | 1  | <i>FGFR1</i>  | c.1864C>T       | p.Arg622*   | nonsense   | heterozygous | 0   | 0.2 |
| 73  | nIHH | M | 1 | 1  | <i>FGFR1</i>  | c.2011G>C       | p.Ala671Pro | missense   | heterozygous | 0   | 0.1 |
| 74  | nIHH | M | 1 | 1  | <i>FGFR1</i>  | c.2038C>T       | p.Gln680*   | nonsense   | heterozygous | 0   | 0.1 |
| 75  | KS   | M | 1 | 1  | <i>FGFR1</i>  | c.2059G>A       | p.Gly687Arg | missense   | heterozygous | 0   | 0.1 |
| 76  | KS   | M | 1 | 1  | <i>FGFR1</i>  | c.2107G>C       | p.Gly703Arg | missense   | heterozygous | 0   | 0.1 |
| 77  | KS   | F | 1 | 1  | <i>KAL1</i>   | c.555G>C        | p.Lys185Asn | missense   | heterozygous | 0   | 0.2 |
| 78  | KS   | F | 1 | 1  | <i>KAL1</i>   | c.1627G>A       | p.Val543Ile | missense   | heterozygous | 0   | 0.4 |
| 79  | nIHH | F | 1 | 1  | <i>DUSP6</i>  | c.229T>A        | p.Phe77Ile  | missense   | heterozygous | 0   | 0.1 |
| 80  | KS   | M | 1 | 1  | <i>DUSP6</i>  | c.566A>G        | p.Asn189Ser | missense   | heterozygous | 0   | 0.2 |
| 81  | KS   | M | 1 | 1  | <i>FLRT3</i>  | c.1016A>G       | p.Lys339Arg | missense   | heterozygous | 0   | 0.1 |
| 82  | nIHH | M | 1 | 1  | <i>HS6ST1</i> | c.917G>A        | p.Arg306Gln | missense   | heterozygous | 0   | 0.1 |
| 83  | KS   | M | 1 | 1  | <i>HS6ST1</i> | c.968G>A        | p.Arg323Gln | missense   | heterozygous | 0   | 0.1 |
| 84  | nIHH | M | 1 | 1  | <i>HS6ST1</i> | c.1144C>T       | p.Arg382Trp | missense   | heterozygous | 0   | 0.2 |
| 85  | KS   | M | 1 | 1  | <i>HS6ST1</i> | c.1210A>G       | p.Met404Val | missense   | heterozygous | 0   | 0.1 |
| 86  | KS   | M | 1 | 1  | <i>IL17RD</i> | c.1403C>T       | p.Ser468Leu | missense   | heterozygous | 0   | 0.1 |
| 87  | KS   | M | 1 | 1  | <i>IL17RD</i> | c.392A>C        | p.Lys131Thr | missense   | heterozygous | 0.3 | 0.2 |
| 88  | KS   | M | 1 | 1  | <i>IL17RD</i> | c.392A>C        | p.Lys131Thr | missense   | heterozygous | 0.3 | 0.2 |
| 89  | KS   | F | 1 | 1  | <i>IL17RD</i> | c.485A>G        | p.Lys162Arg | missense   | heterozygous | 0   | 0.1 |
| 90  | nIHH | M | 1 | 1  | <i>SPRY4</i>  | c.46G>A         | p.Val16Ile  | missense   | heterozygous | 0   | 0.1 |
| 91  | KS   | M | 1 | 1  | <i>SPRY4</i>  | c.299C>T        | p.Thr100Met | missense   | heterozygous | 0   | 0.1 |
| 92  | nIHH | M | 1 | 1  | <i>SPRY4</i>  | c.313G>A        | p.Asp105Asn | missense   | heterozygous | 0   | 0.1 |
| 93  | KS   | M | 1 | 1  | <i>SPRY4</i>  | c.530A>G        | p.Lys177Arg | missense   | heterozygous | 0   | 0.5 |
| 94  | KS   | M | 1 | 1  | <i>SPRY4</i>  | c.530A>G        | p.Lys177Arg | missense   | heterozygous | 0   | 0.5 |
| 95  | KS   | M | 1 | 1  | <i>SPRY4</i>  | c.530A>G        | p.Lys177Arg | missense   | heterozygous | 0   | 0.5 |
| 96  | KS   | M | 1 | 1  | <i>SPRY4</i>  | c.530A>G        | p.Lys177Arg | missense   | heterozygous | 0   | 0.5 |
| 97  | KS   | M | 1 | 1  | <i>SPRY4</i>  | c.626G>A        | p.Cys209Tyr | missense   | heterozygous | 0.3 | 0.1 |
| 98  | nIHH | M | 1 | 1  | <i>SPRY4</i>  | c.841G>A        | p.Val281Met | missense   | heterozygous | 0   | 0.1 |
| 99  | KS   | F | 1 | 1  | <i>GNRHR</i>  | c.317A>G        | p.Gln106Arg | missense   | heterozygous | 0.3 | 1.8 |
| 100 | KS   | M | 1 | 1  | <i>GNRHR</i>  | c.317A>G        | p.Gln106Arg | missense   | heterozygous | 0.3 | 1.8 |

|     |      |   |   |   |               |           |             |          |              |     |     |
|-----|------|---|---|---|---------------|-----------|-------------|----------|--------------|-----|-----|
| 101 | nIHH | F | 1 | 1 | <i>GNRHR</i>  | c.317A>G  | p.Gln106Arg | missense | heterozygous | 0.3 | 1.8 |
| 102 | nIHH | M | 1 | 1 | <i>GNRHR</i>  | c.317A>G  | p.Gln106Arg | missense | heterozygous | 0.3 | 1.8 |
| 103 | nIHH | F | 1 | 1 | <i>GNRHR</i>  | c.436C>T  | p.Pro146Ser | missense | heterozygous | 0   | 0.1 |
| 104 | nIHH | M | 1 | 1 | <i>KISS1R</i> | c.1079A>T | p.His360Leu | missense | heterozygous | 0   | 0.1 |
| 105 | KS   | F | 1 | 1 | <i>PROKR2</i> | c.57del   | p.Asp19fs   | missense | heterozygous | 0   | 0.1 |
| 106 | nIHH | F | 1 | 1 | <i>PROKR2</i> | c.253C>T  | p.Arg85Cys  | missense | heterozygous | 0   | 0.1 |
| 107 | KS   | M | 1 | 1 | <i>PROKR2</i> | c.254G>A  | p.Arg85His  | missense | heterozygous | 0   | 0.1 |
| 108 | KS   | M | 1 | 1 | <i>PROKR2</i> | c.484A>T  | p.Lys162*   | missense | heterozygous | 0   | 0.1 |
| 109 | KS   | M | 1 | 1 | <i>PROKR2</i> | c.491G>A  | p.Arg164Gln | missense | heterozygous | 0   | 0.1 |
| 110 | KS   | M | 1 | 1 | <i>PROKR2</i> | c.518T>G  | p.Leu173Arg | missense | heterozygous | 0   | 0.1 |
| 111 | KS   | M | 1 | 1 | <i>PROKR2</i> | c.889G>A  | p.Val297Ile | missense | heterozygous | 0   | 0.1 |
| 112 | KS   | M | 1 | 1 | <i>PROKR2</i> | c.1069C>T | p.Arg357Trp | missense | heterozygous | 0   | 0.1 |
| 113 | KS   | M | 1 | 1 | <i>PROKR2</i> | c.101G>A  | p.Cys34Tyr  | missense | heterozygous | 0   | 0.1 |
| 114 | KS   | F | 1 | 1 | <i>NSMF</i>   | c.689C>G  | p.Thr203Ser | missense | heterozygous | 0   | 0.1 |
| 115 | nIHH | M | 1 | 1 | <i>GNRH1</i>  | c.217C>T  | p.Arg73*    | missense | heterozygous | 0   | 0.1 |
| 116 | nIHH | M | 1 | 1 | <i>TACR3</i>  | c.824G>A  | p.Trp275*   | nonsense | heterozygous | 0   | 0.7 |
| 117 | nIHH | M | 1 | 1 | <i>TACR3</i>  | c.824G>A  | p.Trp275*   | nonsense | heterozygous | 0   | 0.7 |
| 118 | nIHH | F | 1 | 1 | <i>TACR3</i>  | c.623G>A  | p.Trp208*   | nonsense | heterozygous | 0   | 0.1 |
| 119 | KS   | M | 1 | 1 | <i>TACR3</i>  | c.1264A>G | p.Arg422Gly | missense | heterozygous | 0   | 0.1 |
| 120 | nIHH | M | 1 | 1 | <i>TACR3</i>  | c.857A>G  | p.Lys286Arg | missense | heterozygous | 0.3 | 0.4 |
| 121 | nIHH | M | 1 | 1 | <i>TACR3</i>  | c.1345G>A | p.Ala449Thr | missense | heterozygous | 0.6 | 0.5 |
| 122 | nIHH | M | 1 | 1 | <i>TACR3</i>  | c.824G>A  | p.Trp275*   | nonsense | heterozygous | 0   | 0.7 |
| 123 | nIHH | M | 1 | 1 | <i>TACR3</i>  | c.857A>G  | p.Lys286Arg | missense | heterozygous | 0.3 | 0.4 |
| 124 | nIHH | M | 1 | 1 | <i>TACR3</i>  | c.1345G>A | p.Ala449Thr | missense | heterozygous | 0.6 | 0.5 |

Dx= diagnosis, M= male, F= female, MAF= minor allele frequency.



**Table S4. Variants in Unaffected Control Subjects**

| #  | Sex | # of genes with variants | # of alleles with variants | Gene          | Nucleotide change | Amino acid change | Variant type | Genotype     | Prediction Programs |               |              |                 |          | Annotated SNP | MAF in controls (%) | MAF in individuals (%) | Seen in individuals |
|----|-----|--------------------------|----------------------------|---------------|-------------------|-------------------|--------------|--------------|---------------------|---------------|--------------|-----------------|----------|---------------|---------------------|------------------------|---------------------|
|    |     |                          |                            |               |                   |                   |              |              | Polyphe             | SIFT          | pMut         | Mutation Taster | NNSplice |               |                     |                        |                     |
| 1  | F   | 1                        | 2                          | <i>NSMF</i>   | c.1438A>G         | p.Thr480Ala       | missense     | heterozygous | benign              | --            | pathological | polymorphism    | --       | rs121918340   | 0.3                 | 0                      | no                  |
|    |     |                          |                            | <i>NSMF</i>   | c.1447A>G         | p.Thr483Ala       | missense     | heterozygous | benign              | --            | pathological | polymorphism    | --       | --            | 0.3                 | 0                      | no                  |
| 2  | M   | 1                        | 1                          | <i>NSMF</i>   | c.763G>A          | p.Ala255Thr       | missense     | heterozygous | probably damaging   | --            | neutral      | disease causing | --       | rs142726563   | 0.3                 | 0                      | no                  |
| 3  | F   | 1                        | 1                          | <i>NSMF</i>   | c.1492C>T         | p.Gln498*         | missense     | heterozygous | --                  | --            | --           | disease causing | --       | --            | 0.3                 | 0                      | no                  |
| 4  | M   | 1                        | 1*                         | <i>KAL1</i>   | c.1759G>T         | p.Val587Leu       | missense     | hemizygous   | probably damaging   | tolerated     | pathological | disease causing | --       | --            | 0.4                 | 0.2                    | this study          |
| 5  | F   | 1                        | 1                          | <i>KAL1</i>   | c.94G>A           | p.Ala32Thr        | missense     | heterozygous | benign              | not tolerated | neutral      | polymorphism    | --       | --            | 0.3                 | 0                      | no                  |
| 6  | M   | 1                        | 1                          | <i>FGFR1</i>  | c.1368G>T         | p.Met456Ile       | missense     | heterozygous | benign              | tolerated     | neutral      | disease causing | --       | --            | 0.3                 | 0                      | no                  |
| 7  | F   | 1                        | 1                          | <i>FGFR1</i>  | c.1609A>G         | p.Met537Val       | missense     | heterozygous | benign              | tolerated     | neutral      | disease causing | --       | --            | 0.3                 | 0                      | no                  |
| 8  | F   | 1                        | 1                          | <i>FGF8</i>   | c.1-5G>A          | -                 | missense     | heterozygous | --                  | --            | --           | disease causing | --       | --            | 0.3                 | 0                      | no                  |
| 9  | F   | 1                        | 1                          | <i>FGF8</i>   | c.77C>T           | p.Pro26Leu        | missense     | heterozygous | probably damaging   | not tolerated | neutral      | polymorphism    | --       | rs137852660   | 0.3                 | 0.1                    | this study          |
| 10 | M   | 1                        | 1                          | <i>FGF8</i>   | c.451G>A          | p.Gly151Ser       | missense     | heterozygous | possibly damaging   | tolerated     | pathological | disease causing | --       | --            | 0.3                 | 0                      | no                  |
| 11 | F   | 1                        | 1                          | <i>IL17RD</i> | c.311G>C          | p.Gly104Ala       | missense     | heterozygous | probably damaging   | not tolerated | neutral      | disease causing | --       | --            | 0.3                 | 0                      | no                  |
| 12 | M   | 1                        | 1                          | <i>IL17RD</i> | c.392A>C          | p.Lys131Thr       | missense     | heterozygous | possibly damaging   | not tolerated | pathological | disease causing | --       | rs184758350   | 0.3                 | 0.2                    | this study          |
| 13 | M   | 1                        | 1                          | <i>IL17RD</i> | c.1058G>A         | p.Arg353Gln       | missense     | heterozygous | benign              | tolerated     | pathological | disease causing | --       | --            | 0.3                 | 0                      | no                  |
| 14 | M   | 1                        | 1                          | <i>IL17RD</i> | c.2009C>T         | p.Pro670Leu       | missense     | heterozygous | probably damaging   | not tolerated | pathological | disease causing | --       | rs143119752   | 0.3                 | 0                      | no                  |
| 15 | M   | 1                        | 1                          | <i>SPRY4</i>  | c.722C>A          | p.Ser241Tyr       | missense     | heterozygous | probably damaging   | not tolerated | neutral      | disease causing | --       | rs139512218   | 0.6                 | 0.5                    | this study          |
| 16 | M   | 1                        | 1                          | <i>SPRY4</i>  | c.722C>A          | p.Ser241Tyr       | missense     | heterozygous | probably damaging   | not tolerated | neutral      | disease causing | --       | rs139512218   | 0.6                 | 0.5                    | this study          |
| 17 | M   | 1                        | 1                          | <i>HS6ST1</i> | c.1168G>A         | p.Glu390Lys       | missense     | heterozygous | benign              | tolerated     | neutral      | disease causing | --       | --            | 0.3                 | 0                      | no                  |
| 18 | F   | 1                        | 1                          | <i>HS6ST1</i> | c.1235A>G         | p.*412Trp         | missense     | heterozygous | --                  | --            | --           | polymorphism    | --       | --            | 0.6                 | 0                      | no                  |
| 19 | M   | 1                        | 1                          | <i>HS6ST1</i> | c.1235A>G         | p.*412Trp         | missense     | heterozygous | --                  | --            | --           | polymorphism    | --       | --            | 0.6                 | 0                      | no                  |
| 20 | M   | 1                        | 1                          | <i>HS6ST1</i> | c.1236G>C         | p.*412Tyr         | missense     | heterozygous | --                  | --            | --           | polymorphism    | --       | --            | 0.3                 | 0                      | no                  |
| 21 | M   | 1                        | 1                          | <i>GNRHR</i>  | c.317A>G          | p.Gln106Arg       | missense     | heterozygous | probably damaging   | tolerated     | neutral      | polymorphism    | --       | rs104893836   | 0.3                 | 1.8                    | this study          |
| 22 | M   | 1                        | 1                          | <i>PROKR2</i> | c.868C>T          | p.Pro290Ser       | missense     | heterozygous | probably damaging   | not tolerated | neutral      | polymorphism    | --       | rs149992595   | 0.3                 | 0                      | litterature         |
| 23 | M   | 1                        | 1                          | <i>TACR3</i>  | c.107C>A          | p.Ala36Glu        | missense     | heterozygous | benign              | tolerated     | pathological | polymorphism    | --       | --            | 0.3                 | 0                      | no                  |
| 24 | F   | 1                        | 1                          | <i>TACR3</i>  | c.857A>G          | p.Lys286Arg       | missense     | heterozygous | benign              | tolerated     | neutral      | disease causing | --       | rs2276973     | 0.3                 | 0.4                    | this study          |
| 25 | M   | 1                        | 1                          | <i>TACR3</i>  | c.1345G>A         | p.Ala449Thr       | missense     | heterozygous | benign              | tolerated     | neutral      | polymorphism    | --       | rs17033889    | 0.6                 | 0.5                    | this study          |
| 26 | M   | 1                        | 1                          | <i>TACR3</i>  | c.1345G>A         | p.Ala449Thr       | missense     | heterozygous | benign              | tolerated     | neutral      | polymorphism    | --       | rs17033889    | 0.6                 | 0.5                    | this study          |

M= male, F= female, SNP= single-nucleotide polymorphism, MAF= minor allele frequency

**Table S5. IBAS Rank**

| Rank in Proteome | Significance of IBAS score | Candidate HUGO | IBAS Score  | Candidate ENSG  | Kallmann interactor HUGO | Interaction Data Source (Database PMID OrganismID:SWISSProtID:Database PMID OrganismID:SWISSProtID)                                                                                                                                                                                                                                                                                                                                                                                                                                                                                                                            |
|------------------|----------------------------|----------------|-------------|-----------------|--------------------------|--------------------------------------------------------------------------------------------------------------------------------------------------------------------------------------------------------------------------------------------------------------------------------------------------------------------------------------------------------------------------------------------------------------------------------------------------------------------------------------------------------------------------------------------------------------------------------------------------------------------------------|
| 1 of 12507       | P<0.007                    | <b>IL17RD</b>  | 0.489135803 | ENSG00000144730 | FGFR1                    | hprd 12604616 9606:P11362-Q8NFM7 15 vv::hprd 12604616 9606:P11362-Q8NFM7 hprd_0 vv                                                                                                                                                                                                                                                                                                                                                                                                                                                                                                                                             |
| 2 of 12507       | P<0.007                    | <b>FGF17</b>   | 0.408032946 | ENSG00000162344 | FGFR1                    | hprd 10751172 9606:P11362-O60258 32 vt                                                                                                                                                                                                                                                                                                                                                                                                                                                                                                                                                                                         |
| 3 of 12507       | P<0.007                    | FGF19          | 0.408032946 | ENSG00000158815 | FGFR1                    | KEGG_PPrel 0 9606:ENSG00000162344-ENSG00000077782                                                                                                                                                                                                                                                                                                                                                                                                                                                                                                                                                                              |
| 4 of 12507       | P<0.007                    | FGF18          | 0.408032946 | ENSG00000156427 | FGFR1                    | hprd 10751172 9606:P11362-O76093 33 vt                                                                                                                                                                                                                                                                                                                                                                                                                                                                                                                                                                                         |
| 5 of 12507       | P<0.007                    | FGF13          | 0.408032946 | ENSG00000129682 | FGFR1                    | KEGG_PPrel 0 9606:ENSG00000077782-ENSG00000129682                                                                                                                                                                                                                                                                                                                                                                                                                                                                                                                                                                              |
| 6 of 12507       | P<0.007                    | FGF6           | 0.408032946 | ENSG00000111241 | FGFR1                    | hprd 8663044 9606:P10767-P11362 2 vt                                                                                                                                                                                                                                                                                                                                                                                                                                                                                                                                                                                           |
| 7 of 12507       | P<0.007                    | <b>FGF8</b>    | 0.408032946 | ENSG00000107831 | FGFR1                    | hprd 10574949 9606:P55075-P11362 25 vt::hprd 10574949 9606:P55075-P11362 25 vv                                                                                                                                                                                                                                                                                                                                                                                                                                                                                                                                                 |
| 8 of 12507       | P<0.007                    | FGF9           | 0.408032946 | ENSG00000102678 | FGFR1                    | hprd 10574949 9606:P31371-P11362 26 vt::hprd 10574949 9606:P31371-P11362 26 vv                                                                                                                                                                                                                                                                                                                                                                                                                                                                                                                                                 |
| 9 of 12507       | P<0.007                    | FGF22          | 0.408032946 | ENSG00000070388 | FGFR1                    | KEGG_PPrel 0 9606:ENSG00000070388-ENSG00000077782                                                                                                                                                                                                                                                                                                                                                                                                                                                                                                                                                                              |
| 10 of 12507      | P<0.007                    | KL             | 0.408032946 | ENSG00000133116 | FGFR1                    | reactome_indirect 0 9606:ENSG00000133116-ENSG00000077782                                                                                                                                                                                                                                                                                                                                                                                                                                                                                                                                                                       |
| 11 of 12507      | P<0.007                    | FGF12          | 0.408032946 | ENSG00000114279 | FGFR1                    | KEGG_PPrel 0 9606:ENSG00000114279-ENSG00000077782                                                                                                                                                                                                                                                                                                                                                                                                                                                                                                                                                                              |
| 12 of 12507      | P<0.007                    | BNIP2          | 0.408032946 | ENSG00000140299 | FGFR1                    | GRID_xml 10551883 9606:P11362-NP_004321 6301 Invivo::hprd 10551883 9606:P11362-Q12982 12 vt::hprd 10551883 9606:P11362-Q12982 12 vv                                                                                                                                                                                                                                                                                                                                                                                                                                                                                            |
| 13 of 12507      | P<0.007                    | SNAI1          | 0.408032946 | ENSG00000124216 | FGFR1                    | KEGG_PPrel 0 9606:ENSG00000124216-ENSG00000077782                                                                                                                                                                                                                                                                                                                                                                                                                                                                                                                                                                              |
| 14 of 12507      | P<0.007                    | FGF11          | 0.408032946 | ENSG00000161958 | FGFR1                    | KEGG_PPrel 0 9606:ENSG00000077782-ENSG00000161958                                                                                                                                                                                                                                                                                                                                                                                                                                                                                                                                                                              |
| 15 of 12507      | P<0.007                    | REN            | 0.408032946 | ENSG00000143839 | PCSK1                    | hprd 1597471 9606:P00797-P29120 2 vt::hprd 1597471 9606:P00797-P29120 2 vv                                                                                                                                                                                                                                                                                                                                                                                                                                                                                                                                                     |
| 16 of 12507      | P<0.007                    | FGF21          | 0.408032946 | ENSG00000105550 | FGFR1                    | KEGG_PPrel 0 9606:ENSG00000077782-ENSG00000105550                                                                                                                                                                                                                                                                                                                                                                                                                                                                                                                                                                              |
| 17 of 12507      | P<0.007                    | FGF14          | 0.408032946 | ENSG00000102466 | FGFR1                    | KEGG_PPrel 0 9606:ENSG00000102466-ENSG00000077782                                                                                                                                                                                                                                                                                                                                                                                                                                                                                                                                                                              |
| 18 of 12507      | P<0.007                    | IAPP           | 0.408032946 | ENSG00000121351 | PCSK1                    | hprd 3053705 9606:P10997-P29120 0 vt::hprd 3053705 9606:P10997-P29120 1 vv::hprd 3053705 9606:P10997-P29120 hprd_0 vv                                                                                                                                                                                                                                                                                                                                                                                                                                                                                                          |
| 19 of 12507      | P<0.007                    | FRS2           | 0.407679349 | ENSG00000166225 | FGF8                     | reactome_indirect 0 9606:ENSG00000107831-ENSG00000166225                                                                                                                                                                                                                                                                                                                                                                                                                                                                                                                                                                       |
| 19 of 12507      | P<0.007                    | FRS2           | 0.407679349 | ENSG00000166225 | FGFR1                    | BIND 11729184 10090:NP_034336-NP_808466 130922 elisa::BIND 11729184 10090:NP_034336-NP_808466 130922 immunoprecipitation::BIND 10629055 10090:NP_034336-NP_808466 197402 affinity-chromatography::BIND 10629055 10090:NP_034336-NP_808466 197402 immunoprecipitation::GRID_xml 11877385 9606:P11362-NP_001036020 287448 Reconstituted Complex::GRID_xml 10629055 9606:P11362-NP_001036020 287738 Affinity Capture-Western::GRID_xml 9660748 9606:P11362-NP_001036020 288016 Two-hybrid::GRID_xml 11090629 9606:P11362-NP_001036020 6304 Invivo::hprd 11877385 9606:P11362-Q8WU20 13 vt::hprd 11877385 9606:P11362-Q8WU20 13 vv |
| 20 of 12507      | P<0.007                    | FRS3           | 0.407679349 | ENSG00000137218 | FGFR1                    | GRID_xml 9660748 9606:NP_006644-P11362 6310 Two-hybrid::hprd 9660748 9606:O43559-P11362 14 2H::hprd 9660748 9606:O43559-P11362 14 vt                                                                                                                                                                                                                                                                                                                                                                                                                                                                                           |
| 20 of 12507      | P<0.007                    | FRS3           | 0.407679349 | ENSG00000137218 | FGF8                     | reactome_indirect 0 9606:ENSG00000107831-ENSG00000137218                                                                                                                                                                                                                                                                                                                                                                                                                                                                                                                                                                       |
| 21 of 12507      | P<0.007                    | <b>TAC3</b>    | 0.407679349 | ENSG00000166863 | TACR3                    | GRID_xml 8990205 9606:NP_001050-Q9UHF0 10328 Invivo::hprd 8990205 9606:P29371-Q9UHF0 1 vt::hprd 8990205 9606:P29371-Q9UHF0 1 vv                                                                                                                                                                                                                                                                                                                                                                                                                                                                                                |
| 21 of 12507      | P<0.007                    | TAC1           | 0.407679349 | ENSG00000006128 | TACR3                    | GRID_xml 8702757 9606:P20366-NP_001050 287509 Reconstituted Complex::hprd 9272936 9606:P20366-P29371 3 vv::hprd 9272936 9606:P20366-P29371 hprd_0 vv                                                                                                                                                                                                                                                                                                                                                                                                                                                                           |
| 22 of 12507      | P<0.007                    | RGS10          | 0.407679349 | ENSG00000148908 | GNRHR                    | hprd 12062898 9606:O43665-P30968 1 vv                                                                                                                                                                                                                                                                                                                                                                                                                                                                                                                                                                                          |
| 23 of 12507      | P<0.007                    | TAC4           | 0.407679349 | ENSG00000176358 | TACR3                    | hprd 11786503 9606:P29371-255061 2 vt::hprd 11786503 9606:P29371-255061 2 vv                                                                                                                                                                                                                                                                                                                                                                                                                                                                                                                                                   |
| 24 of 12507      | P<0.007                    | MMP16          | 0.407679349 | ENSG00000156103 | KISS1                    | hprd 12879005 9606:Q15726-P51512 1 vt::hprd 12879005 9606:Q15726-P51512 1 vv                                                                                                                                                                                                                                                                                                                                                                                                                                                                                                                                                   |
| 25 of 12507      | P<0.007                    | <b>GNRH</b>    | 0.407679349 | ENSG00000147437 | GNRHR                    | hprd 9414473 9606:P01148-P30968 2 vv::hprd 9414473 9606:P01148-P30968 hprd_0 vv                                                                                                                                                                                                                                                                                                                                                                                                                                                                                                                                                |
| 26 of 12507      | P<0.007                    | <b>GNRHR</b>   | 0.407679349 | ENSG00000109163 | GNRH                     | hprd 9414473 9606:P01148-P30968 2 vv::hprd 9414473 9606:P01148-P30968 hprd_0 vv                                                                                                                                                                                                                                                                                                                                                                                                                                                                                                                                                |
| 27 of 12507      | P<0.007                    | MMP24          | 0.407679349 | ENSG00000125966 | KISS1                    | hprd 12879005 9606:Q9Y5R2-Q15726 hprd_0 vv                                                                                                                                                                                                                                                                                                                                                                                                                                                                                                                                                                                     |
| 28 of 12507      | P<0.007                    | <b>GPR54</b>   | 0.407679349 | ENSG00000116014 | KISS1                    | GRID_xml 11457843 9606:NP_115940-NP_002247 26232 Invivo::hprd 11457843 9606:Q969F8-Q15726 4 vt::hprd 11457843 9606:Q969F8-Q15726 4 vv::hprd 11457843 9606:Q969F8-Q15726 hprd_0 vv                                                                                                                                                                                                                                                                                                                                                                                                                                              |
| 29 of 12507      | P<0.007                    | MMP2           | 0.407679349 | ENSG00000087245 | FGFR1                    | hprd 8692946 9606:P11362-P08253 6 vt::hprd 8692946 9606:P11362-P08253 6 vv                                                                                                                                                                                                                                                                                                                                                                                                                                                                                                                                                     |
| 30 of 12507      | P<0.007                    | MMP2           | 0.407679349 | ENSG00000087245 | KISS1                    | hprd 12879005 9606:Q15726-P08253 23 vt::hprd 12879005 9606:Q15726-P08253 23 vv::hprd 12879005 9606:Q15726-P08253 hprd_0 vv                                                                                                                                                                                                                                                                                                                                                                                                                                                                                                     |
| 31 of 12507      | P<0.007                    | GPRASP1        | 0.407325753 | ENSG00000198932 | TAC3                     | GRID_xml 16169070 9606:Q9UHF0-NP_001092881 270830 Two-hybrid::hprd 16169070 9606:Q9UHF0-Q5JY77 15 2H::MINT 16169070 9606:Q9UHF0-Q5JY77 15513 two hybrid                                                                                                                                                                                                                                                                                                                                                                                                                                                                        |
| 31 of 12507      | P<0.007                    | GPRASP1        | 0.407325753 | ENSG00000198932 | TACR3                    | hprd 15452121 9606:P29371-Q5JY77 3 vt                                                                                                                                                                                                                                                                                                                                                                                                                                                                                                                                                                                          |
| 32 of 12507      | P<0.007                    | TACR1          | 0.326576492 | ENSG00000115353 | TAC3                     | hprd 12727971 9606:Q9UHF0-P25103 2 vt                                                                                                                                                                                                                                                                                                                                                                                                                                                                                                                                                                                          |
| 33 of 12507      | P<0.007                    | <b>TACR3</b>   | 0.326576492 | ENSG00000169836 | TAC3                     | GRID_xml 8990205 9606:NP_001050-Q9UHF0 10328 Invivo::hprd 8990205 9606:P29371-Q9UHF0 1 vt::hprd 8990205 9606:P29371-Q9UHF0 1 vv                                                                                                                                                                                                                                                                                                                                                                                                                                                                                                |
| 34 of 12507      | P<0.007                    | TACR2          | 0.326576492 | ENSG00000075073 | TAC3                     | GRID_xml 7961636 9606:NP_001048-Q9UHF0 10317 Invivo::hprd 7961636 9606:P21452-Q9UHF0 1 vv::hprd 7961636 9606:P21452-Q9UHF0 hprd_0 vv                                                                                                                                                                                                                                                                                                                                                                                                                                                                                           |
| 35 of 12507      | P<0.007                    | <b>KISS1</b>   | 0.326576492 | ENSG00000170498 | GPR54                    | GRID_xml 11457843 9606:NP_115940-NP_002247 26232 Invivo::hprd 11457843 9606:Q969F8-Q15726 4 vt::hprd 11457843 9606:Q969F8-Q15726 4 vv::hprd 11457843 9606:Q969F8-Q15726 hprd_0 vv                                                                                                                                                                                                                                                                                                                                                                                                                                              |

All proteins with a significant IBAS score and the CHH-associated protein with which they interact. The last column indicates the source of evidence for the interaction. Genes reported in this study (*IL17RD*, *FGF17*) are noted in bold. The proteins highlighted in yellow are among the ones the IBAS model was trained on.

## References

1. Pitteloud, N., Acierno, J.S., Jr., Meysing, A., Eliseenkova, A.V., Ma, J., Ibrahimi, O.A., Metzger, D.L., Hayes, F.J., Dwyer, A.A., Hughes, V.A., et al. (2006). Mutations in fibroblast growth factor receptor 1 cause both Kallmann syndrome and normosmic idiopathic hypogonadotropic hypogonadism. *Proceedings of the National Academy of Sciences of the United States of America* 103, 6281-6286.
2. Dode, C., Leveilliers, J., Dupont, J.M., De Paepe, A., Le Du, N., Soussi-Yanicostas, N., Coimbra, R.S., Delmaghani, S., Compain-Nouaille, S., Baverel, F., et al. (2003). Loss-of-function mutations in FGFR1 cause autosomal dominant Kallmann syndrome. *Nature genetics* 33, 463-465.
3. Raivio, T., Sidis, Y., Plummer, L., Chen, H., Ma, J., Mukherjee, A., Jacobson-Dickman, E., Quinton, R., Van Vliet, G., Lavoie, H., et al. (2009). Impaired fibroblast growth factor receptor 1 signaling as a cause of normosmic idiopathic hypogonadotropic hypogonadism. *The Journal of clinical endocrinology and metabolism* 94, 4380-4390.
4. Sykiotis, G.P., Plummer, L., Hughes, V.A., Au, M., Durrani, S., Nayak-Young, S., Dwyer, A.A., Quinton, R., Hall, J.E., Gusella, J.F., et al. (2010). Oligogenic basis of isolated gonadotropin-releasing hormone deficiency. *Proceedings of the National Academy of Sciences of the United States of America* 107, 15140-15144.
5. Pitteloud, N., Meysing, A., Quinton, R., Acierno, J.S., Jr., Dwyer, A.A., Plummer, L., Fliers, E., Boepple, P., Hayes, F., Seminara, S., et al. (2006). Mutations in fibroblast growth factor receptor 1 cause Kallmann syndrome with a wide spectrum of reproductive phenotypes. *Molecular and cellular endocrinology* 254-255, 60-69.
6. Albuissou, J., Pecheux, C., Carel, J.C., Lacombe, D., Leheup, B., Lapuzina, P., Bouchard, P., Legius, E., Matthijs, G., Wasniewska, M., et al. (2005). Kallmann syndrome: 14 novel mutations in KAL1 and FGFR1 (KAL2). *Human mutation* 25, 98-99.
7. Pitteloud, N., Quinton, R., Pearce, S., Raivio, T., Acierno, J., Dwyer, A., Plummer, L., Hughes, V., Seminara, S., Cheng, Y.Z., et al. (2007). Digenic mutations account for variable phenotypes in idiopathic hypogonadotropic hypogonadism. *The Journal of clinical investigation* 117, 457-463.
8. Trarbach, E.B., Costa, E.M., Versiani, B., de Castro, M., Baptista, M.T., Garmes, H.M., de Mendonca, B.B., and Latronico, A.C. (2006). Novel fibroblast growth factor receptor 1 mutations in patients with congenital hypogonadotropic hypogonadism with and without anosmia. *The Journal of clinical endocrinology and metabolism* 91, 4006-4012.
9. Sato, N., Hasegawa, T., Hori, N., Fukami, M., Yoshimura, Y., and Ogata, T. (2005). Gonadotrophin therapy in Kallmann syndrome caused by heterozygous mutations of the gene for fibroblast growth factor receptor 1: report of three families: case report. *Human reproduction* 20, 2173-2178.
10. Cadman, S.M., Kim, S.H., Hu, Y., Gonzalez-Martinez, D., and Bouloux, P.M. (2007). Molecular pathogenesis of Kallmann's syndrome. *Hormone research* 67, 231-242.
11. Chen, H., Xu, C.F., Ma, J., Eliseenkova, A.V., Li, W., Pollock, P.M., Pitteloud, N., Miller, W.T., Neubert, T.A., and Mohammadi, M. (2008). A crystallographic snapshot of tyrosine trans-phosphorylation in action. *Proceedings of the National Academy of Sciences of the United States of America* 105, 19660-19665.
12. Falardeau, J., Chung, W.C., Beenken, A., Raivio, T., Plummer, L., Sidis, Y., Jacobson-Dickman, E.E., Eliseenkova, A.V., Ma, J., Dwyer, A., et al. (2008). Decreased FGF8 signaling causes deficiency of gonadotropin-releasing hormone in humans and mice. *The Journal of clinical investigation* 118, 2822-2831.
13. Oliveira, L.M., Seminara, S.B., Beranova, M., Hayes, F.J., Valkenburgh, S.B., Schipani, E., Costa, E.M., Latronico, A.C., Crowley, W.F., Jr., and Vallejo, M. (2001). The importance of autosomal genes in Kallmann syndrome: genotype-phenotype correlations and neuroendocrine characteristics. *The Journal of clinical endocrinology and metabolism* 86, 1532-1538.
14. Sato, N., Katsumata, N., Kagami, M., Hasegawa, T., Hori, N., Kawakita, S., Minowada, S., Shimotsuka, A., Shishiba, Y., Yokozawa, M., et al. (2004). Clinical assessment and mutation analysis of Kallmann syndrome 1 (KAL1) and fibroblast growth factor receptor 1 (FGFR1, or KAL2) in five families and 18 sporadic patients. *The Journal of clinical endocrinology and metabolism* 89, 1079-1088.

15. Hardelin, J.P., Levilliers, J., Blanchard, S., Carel, J.C., Leutenegger, M., Pinard-Bertelatto, J.P., Bouloux, P., and Petit, C. (1993). Heterogeneity in the mutations responsible for X chromosome-linked Kallmann syndrome. *Human molecular genetics* 2, 373-377.
16. Hardelin, J.P., Levilliers, J., del Castillo, I., Cohen-Salmon, M., Legouis, R., Blanchard, S., Compain, S., Bouloux, P., Kirk, J., Moraine, C., et al. (1992). X chromosome-linked Kallmann syndrome: stop mutations validate the candidate gene. *Proceedings of the National Academy of Sciences of the United States of America* 89, 8190-8194.
17. Tornberg, J., Sykiotis, G.P., Keefe, K., Plummer, L., Hoang, X., Hall, J.E., Quinton, R., Seminara, S.B., Hughes, V., Van Vliet, G., et al. (2011). Heparan sulfate 6-O-sulfotransferase 1, a gene involved in extracellular sugar modifications, is mutated in patients with idiopathic hypogonadotrophic hypogonadism. *Proceedings of the National Academy of Sciences of the United States of America* 108, 11524-11529.
